# Supplementary material for: A sensitive and selective BINOL based ratiometric fluorescence sensor for the detection of cyanide ions
Source: Royal Society of Chemistry journal article supplement (doi:10.1039/d1ra01213d), 2021-01-01
Supplement: d1ra01213d1.pdf [file d1ra01213d1.pdf]

## Supporting information

### **A sensitive and selective “turn-on” fluorescence sensor engaging BINOL unit for rapid detection of cyanide Anion**

Sathishkumar Munusamy, Sathish Swaminathan, Dhanapal Jothi, Vivek Panyam Muralidharan and Sathiyarayanan Kulathu Iyer\*

<sup>a</sup> *Chemistry Department, School of Advanced Sciences, VIT University, Vellore-632014, Tamil Nadu, India*

<sup>b</sup> *Instituto de Ciencias Físicas, Universidad Nacional Autónoma de México, Cuernavaca, Mexico.*

E-mail: [sathiya\\_kuna@hotmail.com](mailto:sathiya_kuna@hotmail.com)

## CONTENT

|                                                                                                                                                    |          |
|----------------------------------------------------------------------------------------------------------------------------------------------------|----------|
| <b>Fig. S1</b> Copies of <sup>1</sup> H NMR and <sup>13</sup> C NMR of compound <b>2</b> -----                                                     | <b>2</b> |
| <b>Fig. S2</b> Copies of <sup>1</sup> H NMR and <sup>13</sup> C NMR of compound <b>BBCN</b> -----                                                  | <b>3</b> |
| <b>Fig. S3</b> HRMS of compound <b>2</b> -----                                                                                                     | <b>4</b> |
| <b>Fig. S4</b> HRMS of compound <b>BBCN</b> -----                                                                                                  | <b>4</b> |
| <b>Fig. S5</b> Bar diagram representing fluorescent ratiometric value ( $I_{315}/I_{395}$ ) against various anions tested with <b>BBCN</b> . ----- | <b>5</b> |
| <b>Fig. S6</b> Plot of fluorescence intensity change at 315 nm against the concentration CN <sup>-</sup> ion and the calculation of LOD. -----     | <b>5</b> |
| -                                                                                                                                                  |          |
| <b>Fig. S7</b> ESI-MS spectra of <b>BBCN+CN<sup>-</sup></b> -----                                                                                  | <b>6</b> |
| <b>Table S1</b> Comparison of LOD of CN <sup>-</sup> detection reported in recent papers-----                                                      | <b>7</b> |

Signature SIF VIT VELLORE  
OXOBINOL-BR-CN

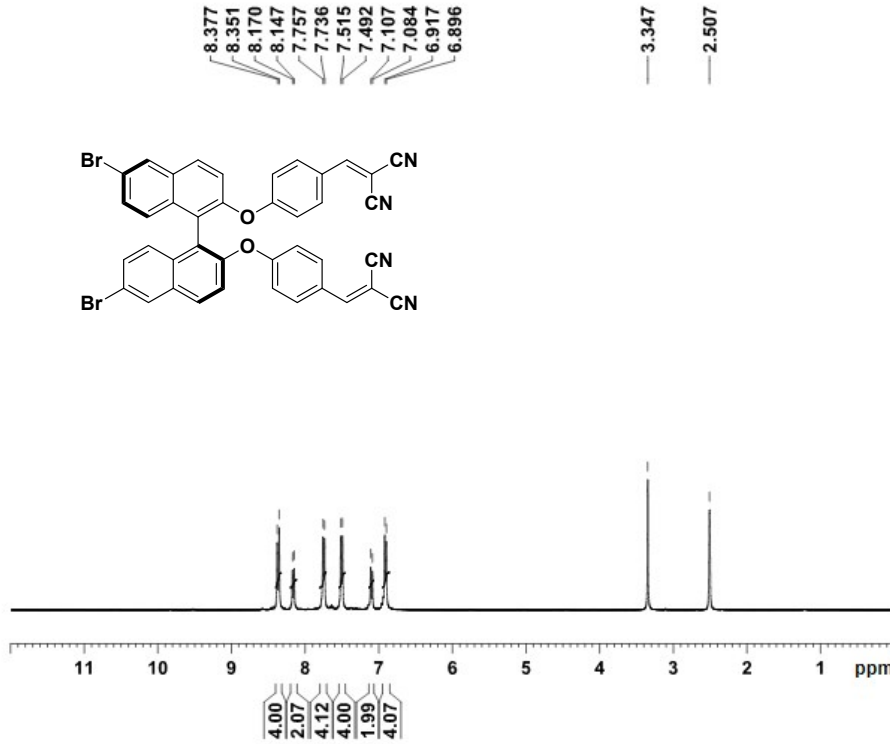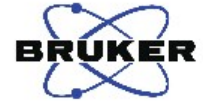

Current Data Parameters  
NAME Dr.SYN170417  
EXPNO 51  
PROCNO 1

F2 - Acquisition Parameters  
Date\_ 20170418  
Time 2.39 h  
INSTRUM spect  
PROBHD Z108618\_0505 ( )  
PULPROG zg30  
TD 65536  
SOLVENT DMSO  
NS 16  
DS 2  
SWH 8012.820 Hz  
FIDRES 0.244532 Hz  
AQ 4.0894465 sec  
RG 143.73  
DW 62.400 usec  
DE 6.50 usec  
TE 299.2 K  
D1 1.00000000 sec  
TD0 1  
SFO1 400.2604716 MHz  
NUC1 1H  
P1 14.23 usec  
PLW1 14.00000000 W

F2 - Processing parameters  
SI 65536  
SF 400.2580000 MHz  
WDW EM  
SSE 0  
LB 0.30 Hz  
GB 0  
PC 1.00

Signature SIF VIT VELLORE  
OXOBINOL-BR-CN

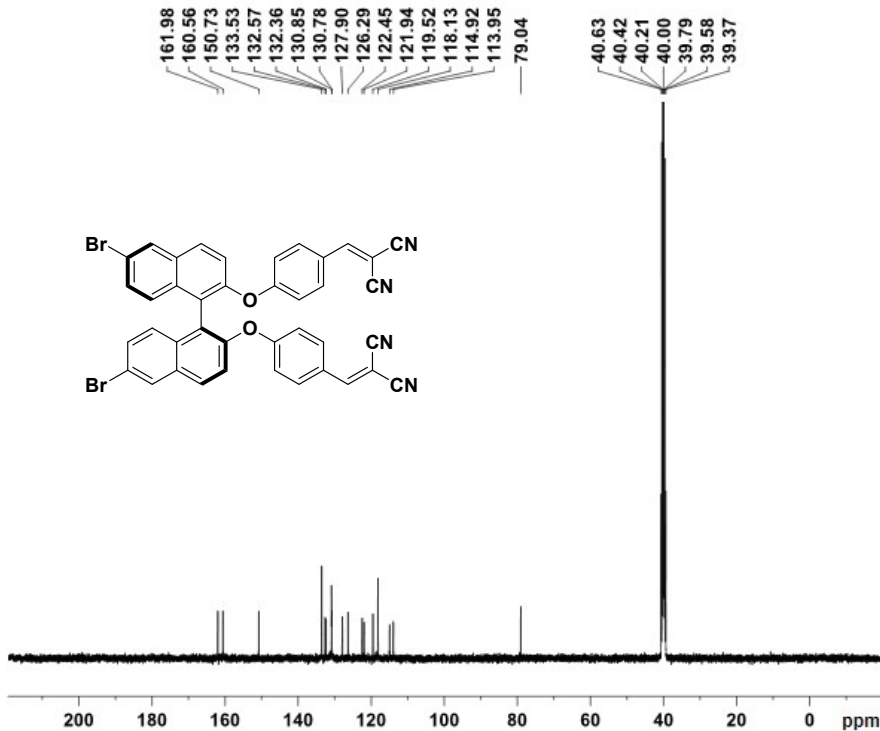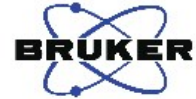

Current Data Parameters  
NAME Dr.SYN170417  
EXPNO 52  
PROCNO 1

F2 - Acquisition Parameters  
Date\_ 20170418  
Time 3.08 h  
INSTRUM spect  
PROBHD Z108618\_0505 ( )  
PULPROG zgpg30  
TD 65536  
SOLVENT DMSO  
NS 512  
DS 4  
SWH 24038.461 Hz  
FIDRES 0.733596 Hz  
AQ 1.3631488 sec  
RG 156.91  
DW 20.800 usec  
DE 6.50 usec  
TE 299.0 K  
D1 2.00000000 sec  
D11 0.03000000 sec  
TD0 1  
SFO1 100.6550186 MHz  
NUC1 13C  
P1 9.80 usec  
PLW1 58.00000000 W  
SFO2 400.2596010 MHz  
NUC2 1H  
CPDPRG2 waltz16  
PCPD2 90.00 usec  
PLW2 14.00000000 W  
PLW12 0.35097000 W  
PLW13 0.17654000 W

F2 - Processing parameters  
SI 32768  
SF 100.6449542 MHz  
WDW EM  
SSE 0  
LB 1.00 Hz  
GB 0  
PC 1.40

**Fig. S1** Copies of  $^1\text{H}$  NMR and  $^{13}\text{C}$  NMR of compound 2

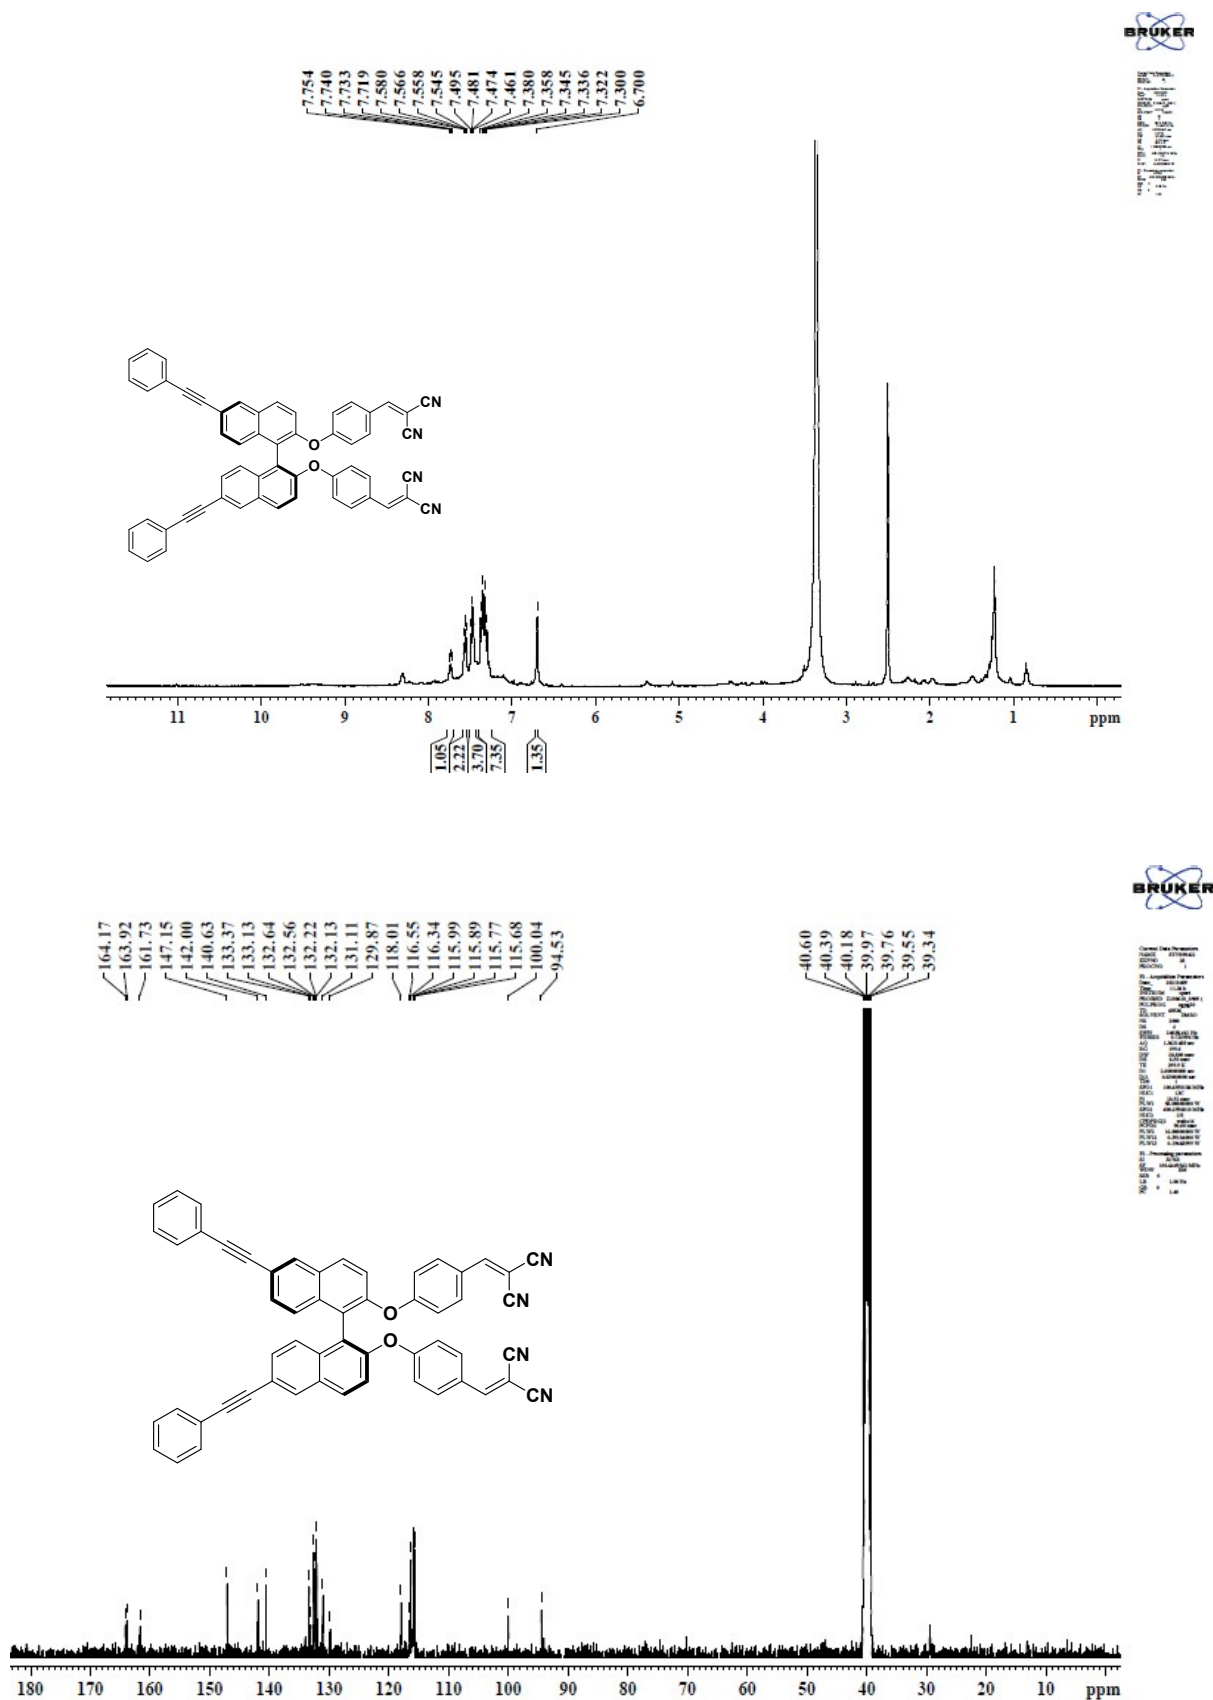

**Fig. S2** Copies of  $^1\text{H}$  NMR and  $^{13}\text{C}$  NMR of compound **BBCN**

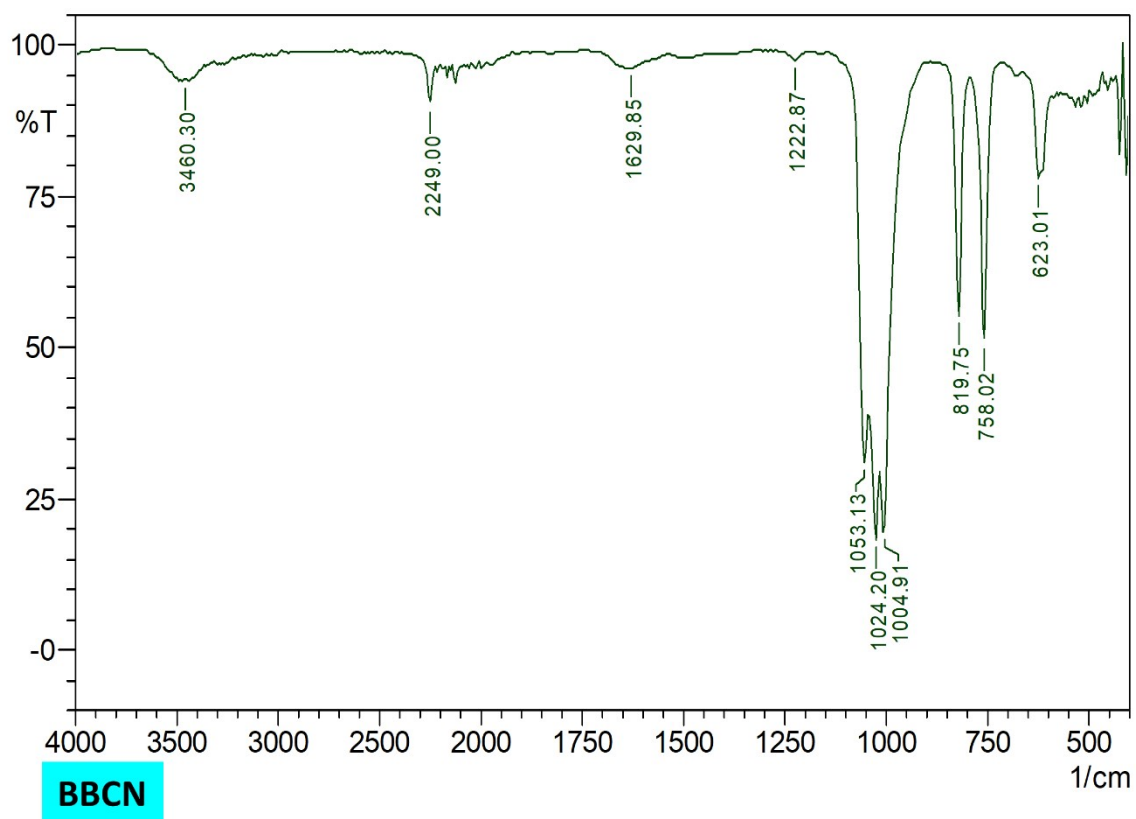

**Fig. S3** Copy of FT-IR spectra of **BBCN**

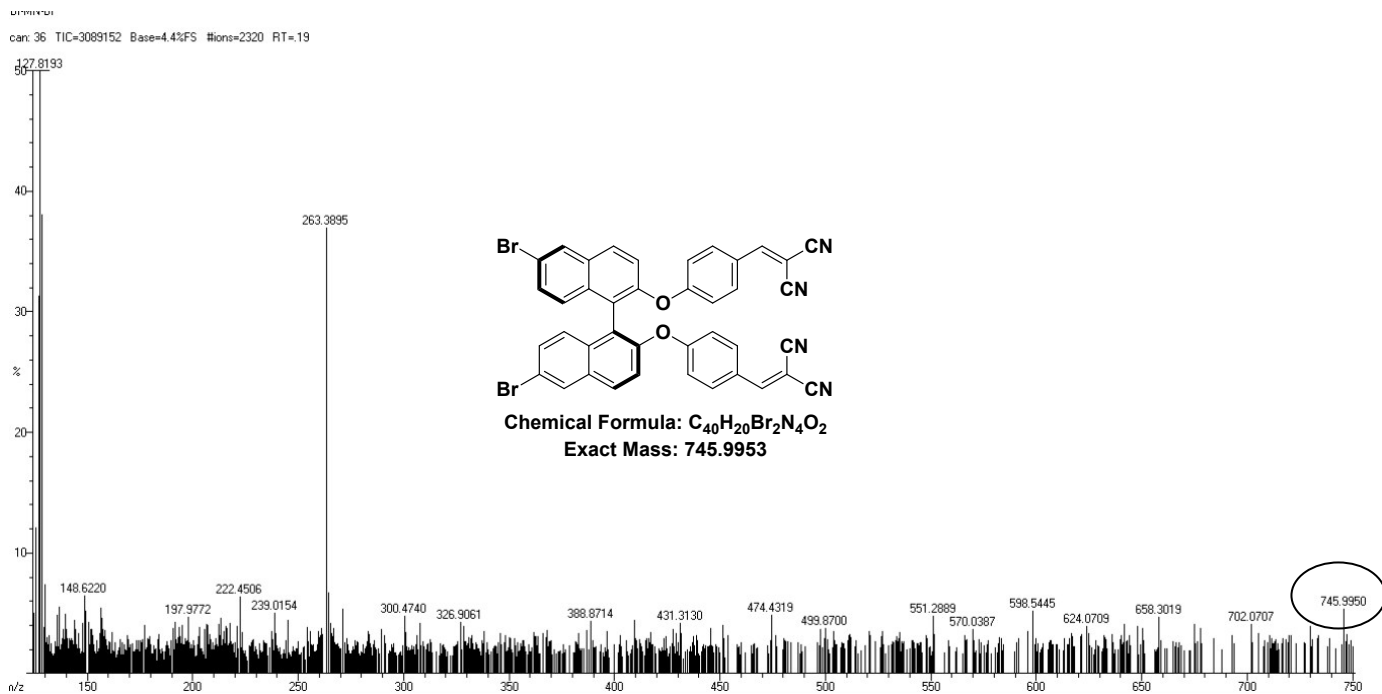

Fig. S4 HRMS of compound 2

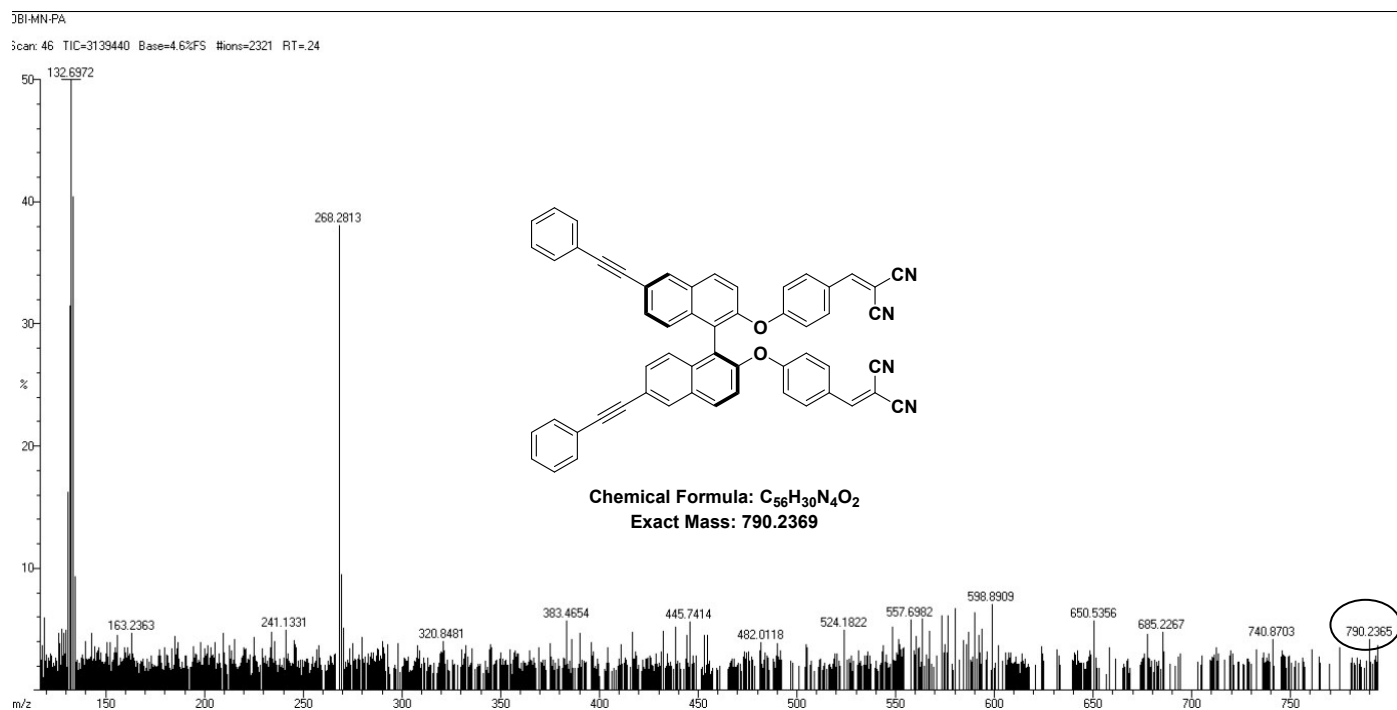

Fig. S5 HRMS of compound BBCN

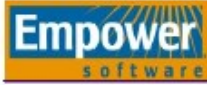

## Multi Sample Summary

Reported by User: System

Project Name: VIT2021

### SAMPLE INFORMATION

|                   |              |                     |                     |
|-------------------|--------------|---------------------|---------------------|
| Sample Name:      | BBCN         | Acquired By:        | System              |
| Sample Type:      | Unknown      | Date Acquired:      | 4/6/2021 2:10:35 PM |
| Vial:             | 1            | Acq. Method Set:    | 2021                |
| Injection #:      | 16           | Date Processed:     | 4/6/2021 3:19:17 PM |
| Injection Volume: | 20.00 ul     | Processing Method:  | sathish 06042021    |
| Run Time:         | 10.0 Minutes | Channel Name:       | 2487Channel 1       |
| Sample Set Name:  |              | Proc. Chnl. Descr.: | 342                 |

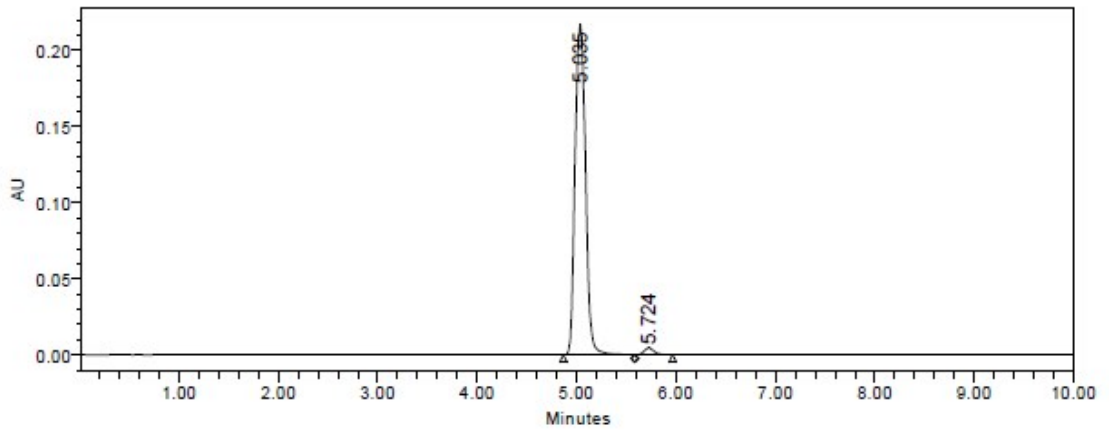

|   | RT    | Area    | % Area | Height |
|---|-------|---------|--------|--------|
| 1 | 5.035 | 1571236 | 98.11  | 217347 |
| 2 | 5.724 | 30247   | 1.89   | 4503   |

#### Chromatography parameters:

**Column** : Hypersil C18 (250 x4.6mm) 5µm

**Detector** : UV at 342 nm

**Injection Volume** : 20µL

**Run Time** : 10 minutes

**Temperature** : Ambient

**Elution program** : Isocratic

**Mobile Phase** : Water:Acetonitrile (60:40)

**Fig. S6** HPLC of compound **BBCN**

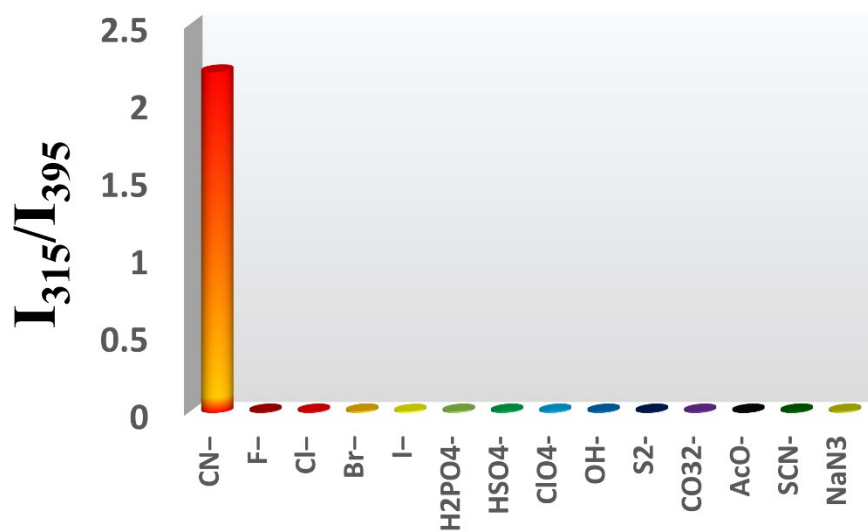

**Fig. S7** Bar diagram representing fluorescent ratiometric value (I<sub>315</sub>/I<sub>395</sub>) against various anions tested with **BBCN**.

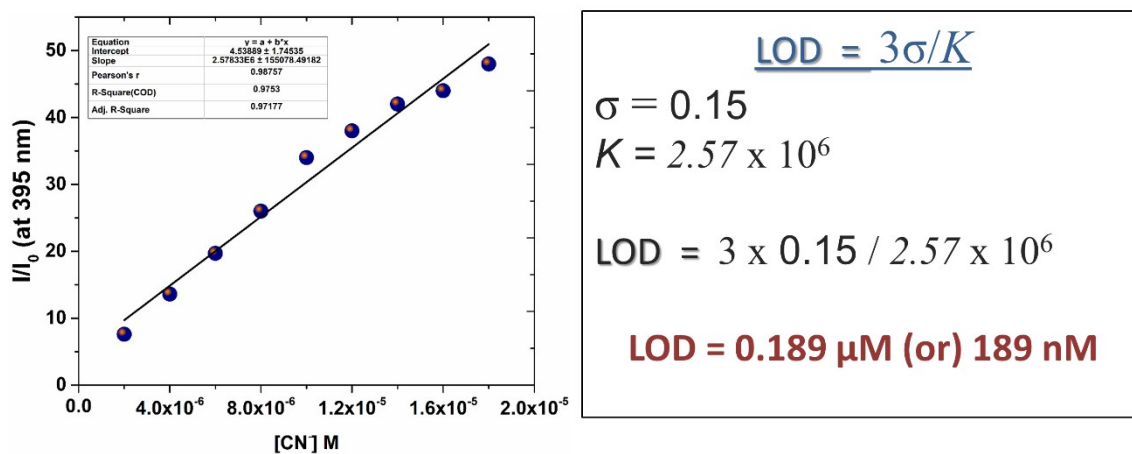

**Fig. S8** Plot of fluorescence intensity change at 315 nm against the concentration CN<sup>-</sup> ion and the calculation of LOD.

# Spectrum Plot Report

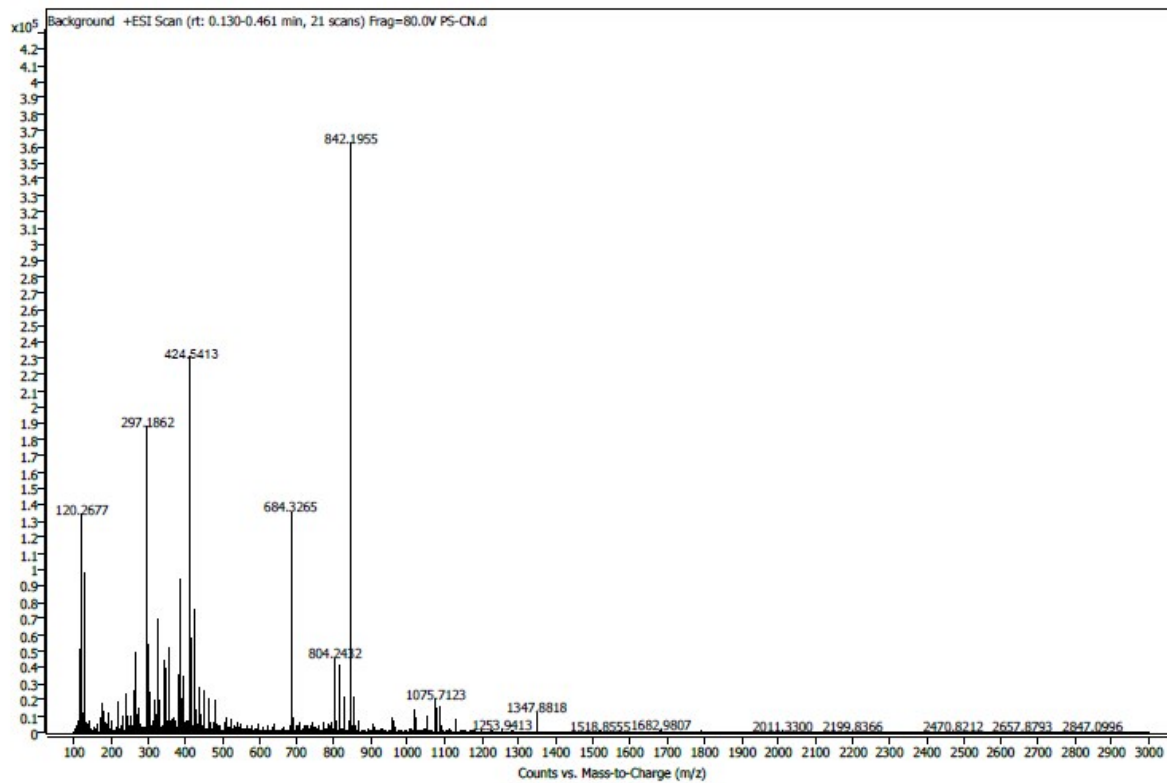

**Fig. S9** ESI-MS spectra of **BBCN+CN<sup>-</sup>**.



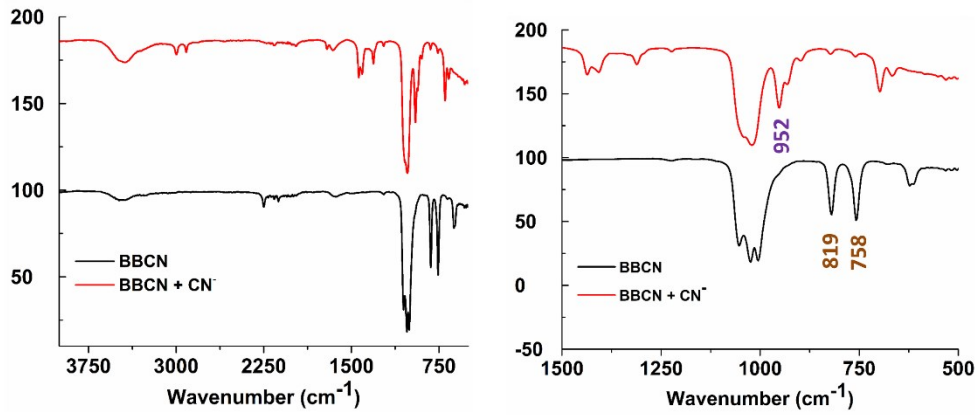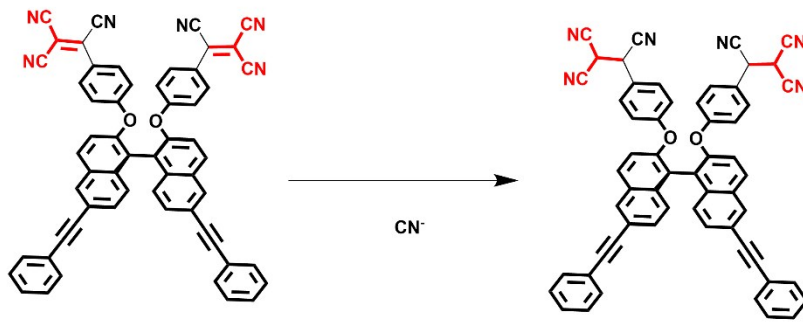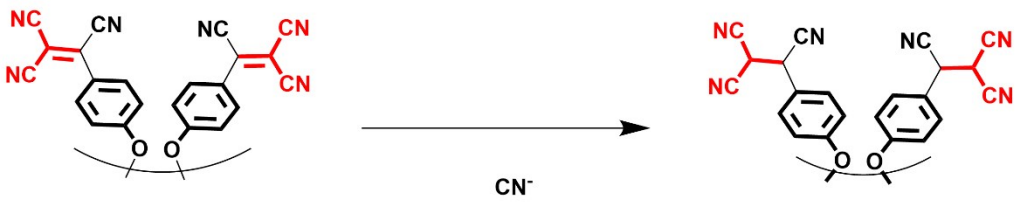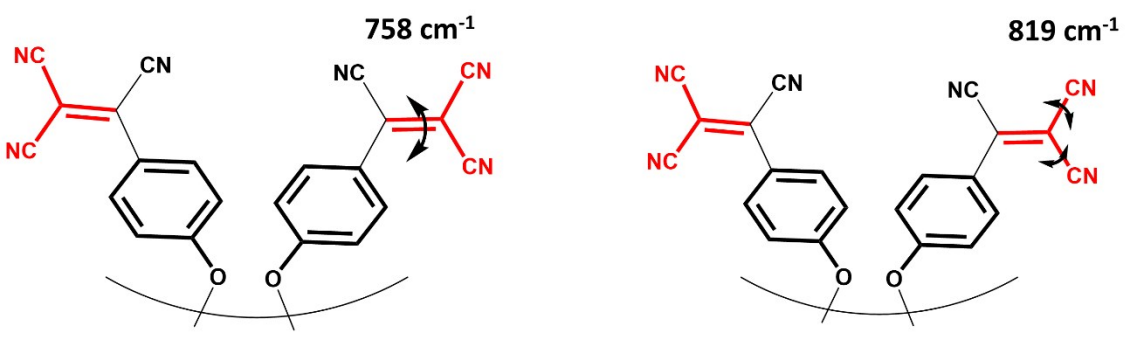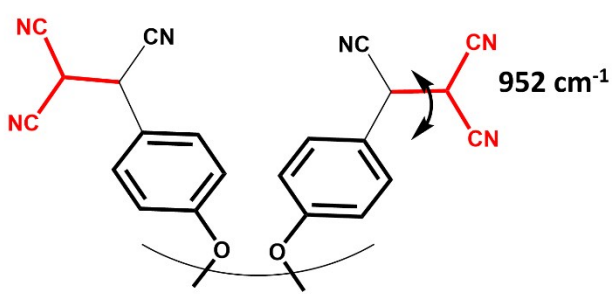

**Fig. S10** FT-IR spectra of **BBCN** and **BBCN+CN<sup>-</sup>**.**Table S1**Comparison of LOD of CN<sup>-</sup> detection reported in recent papers

| S.No | Reported Probe                          | LOD<br>(nM) | Reference                                                                                                        |
|------|-----------------------------------------|-------------|------------------------------------------------------------------------------------------------------------------|
| 1    | Naphthoquinone-benzothiazole            | 490         | Sensors Actuators B Chem. 246 (2017) 319–326.                                                                    |
| 2    | Pyrazolo[1,5a]pyrimidine-hemicyanine    | 86          | Talanta. 196 (2019) 395–401                                                                                      |
| 3    | Thiadiazole                             | 350         | Sensors Actuators B Chem. 296 (2019) 126645.                                                                     |
| 4    | Dicyanovinylpyrazolo[1,5-a]pyrimidines  | 170         | Talanta. 215 (2020) 120905.                                                                                      |
| 5    | Bithiophene-Meldrum's acid              | 960         | Dye. Pigment. 180 (2020) 108459                                                                                  |
| 6    | BODIPY based                            | 4230        | Dye. Pigment. 170 (2019) 107598                                                                                  |
| 7    | Thiophene conjugated with benzothiazole | 42          | Dye. Pigment. 183 (2020) 108713                                                                                  |
| 8    | Pillar[5]arene                          | 25          | Dye. Pigment. 164 (2019) 279–286                                                                                 |
| 9    | Oligothiophene-benzothiazole            | 460         | Sensors Actuators B Chem. 276 (2018) 13–22                                                                       |
| 10   | Carbazole-based sensor                  | 67          | Dye. Pigment. 164 (2019) 165–173                                                                                 |
| 11   | Diketodiphenylpyrrolopyrrole            | 171         | Sensors Actuators B Chem. 245 (2017) 845–852                                                                     |
| 12   | BODIPY based                            | 480         | J. Mater. Chem. C. (2021). <a href="https://doi.org/10.1039/D0TC05000H">https://doi.org/10.1039/D0TC05000H</a> . |
| 13   | Phenylquinazolinone-based               | 40          | RSC Adv. 10 (2020) 44860–44875                                                                                   |
| 14   | Nitrobenzoxadiazole (NBD)-antipyrine    | 167         | Anal. Methods. 12 (2020) 4526–4533                                                                               |
| 15   | Disulfide Schiff base                   | 250         | New J. Chem. 43 (2019) 13536–13544                                                                               |
| 16   | Benzothiazolium bromide                 | 339         | J. Mater. Chem. B. 7 (2019) 4620–4629                                                                            |
| 17   | Imidazole-based                         | 800         | Photochem. Photobiol. Sci. 17 (2018) 1450–1461                                                                   |
| 18   | Pyrazole based                          | 6800        | J. Org. Chem. 82 (2017) 13376–13385                                                                              |
| 19   | Squaraine Dye                           | 1700        | European J. Org. Chem. 2017 (2017) 3957–3964                                                                     |

|           |                      |            |                                            |
|-----------|----------------------|------------|--------------------------------------------|
| 20        | Carbazole-Based AIEE | 90         | Eur. J. Inorg. Chem. 2017 (2017) 2457–2463 |
| <b>21</b> | <b>BINOL based</b>   | <b>189</b> | <b>This work</b>                           |
